# Supplementary material for: Feasibility of a novel self-collection method for blood samples and its acceptability for future home-based PrEP monitoring
Source: Springer Nature journal article supplement (doi:10.1186/s12879-022-07432-0), 2022-05-13
Supplement: MOESM3 [file 20400024]

## TASSO-LH

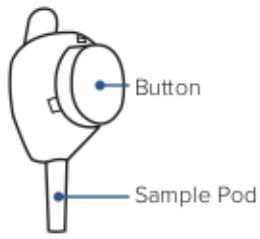

## INCLUDED

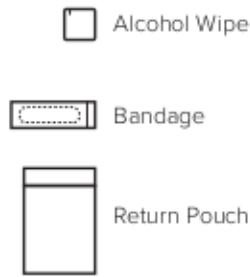

## PREPARE

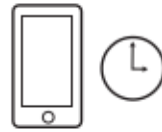

### 1. GET TIMER

You will start a three minute timer in step 9.

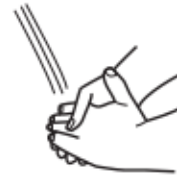

### 2. WASH HANDS

Use soap and warm water.

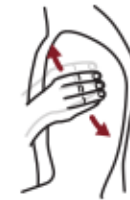

### 3. WARM ARM

Expose shoulder and rub quickly just below the shoulder until it feels warm.

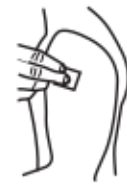

### 4. CLEAN ARM

Using the alcohol pad, wipe the warmed area. Let it dry.

## COLLECT

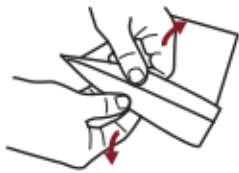

### 5. OPEN POUCH

Pull the two layers of the device pouch apart from the middle to open.

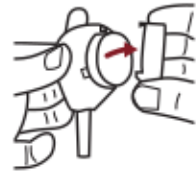

### 6. REMOVE CAP

Pull off the clear plastic cover over the red button.

**DO NOT PRESS THE RED BUTTON YET.**

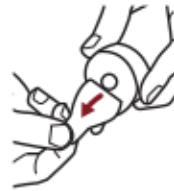

### 7. PEEL BACKING

Pull the tab behind the red button to remove the paper backing.

**KEEP SAMPLE POD POINTING DOWN.**

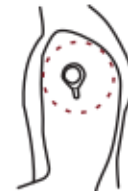

### 8. STICK DEVICE

Stick the device to the warm and clean area on shoulder.

**DO NOT REMOVE ONCE IT'S ON.**

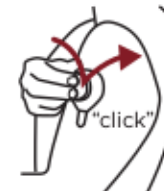

### 9. PRESS BUTTON

Press the red button firmly. Let go when you hear a loud click. You won't see blood right away.

**START A 3 MINUTE TIMER.**

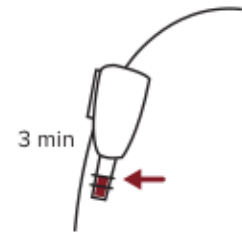

### 10. WAIT FOR BLOOD

Allow tube to fill to the top (no space visible at the top of the tube) before going to next step.

**KEEP ARM AT SIDE DURING COLLECTION.**

## RETURN

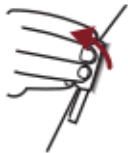

### 11. PEEL OFF DEVICE

Slowly peel the device off arm.

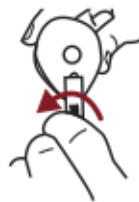

### 12. REMOVE TUBE

Remove tube by firmly twisting it a quarter turn and pulling down.

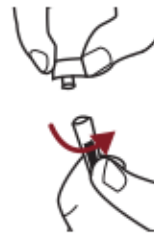

### 13. CAP TUBE

Twist the cap firmly onto the tube.

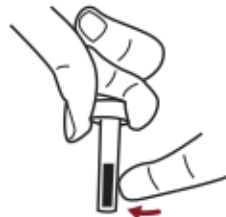

### 14. MIX BLOOD

Flick the side of the tube a couple of times to mix the blood.

**DO NOT SHAKE.**

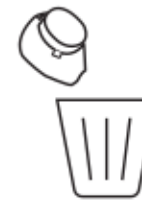

### 15. DISCARD BUTTON

Used device may be placed in the sharps container or standard trash.
